# Supplementary figures and images for: Twelve New Species Reveal Cryptic Diversification in Foliicolous Lichens of Strigula s.lat. (Strigulales, Ascomycota)
Source: MDPI journal article supplement (doi:10.3390/jof8010002), 2021-12-21

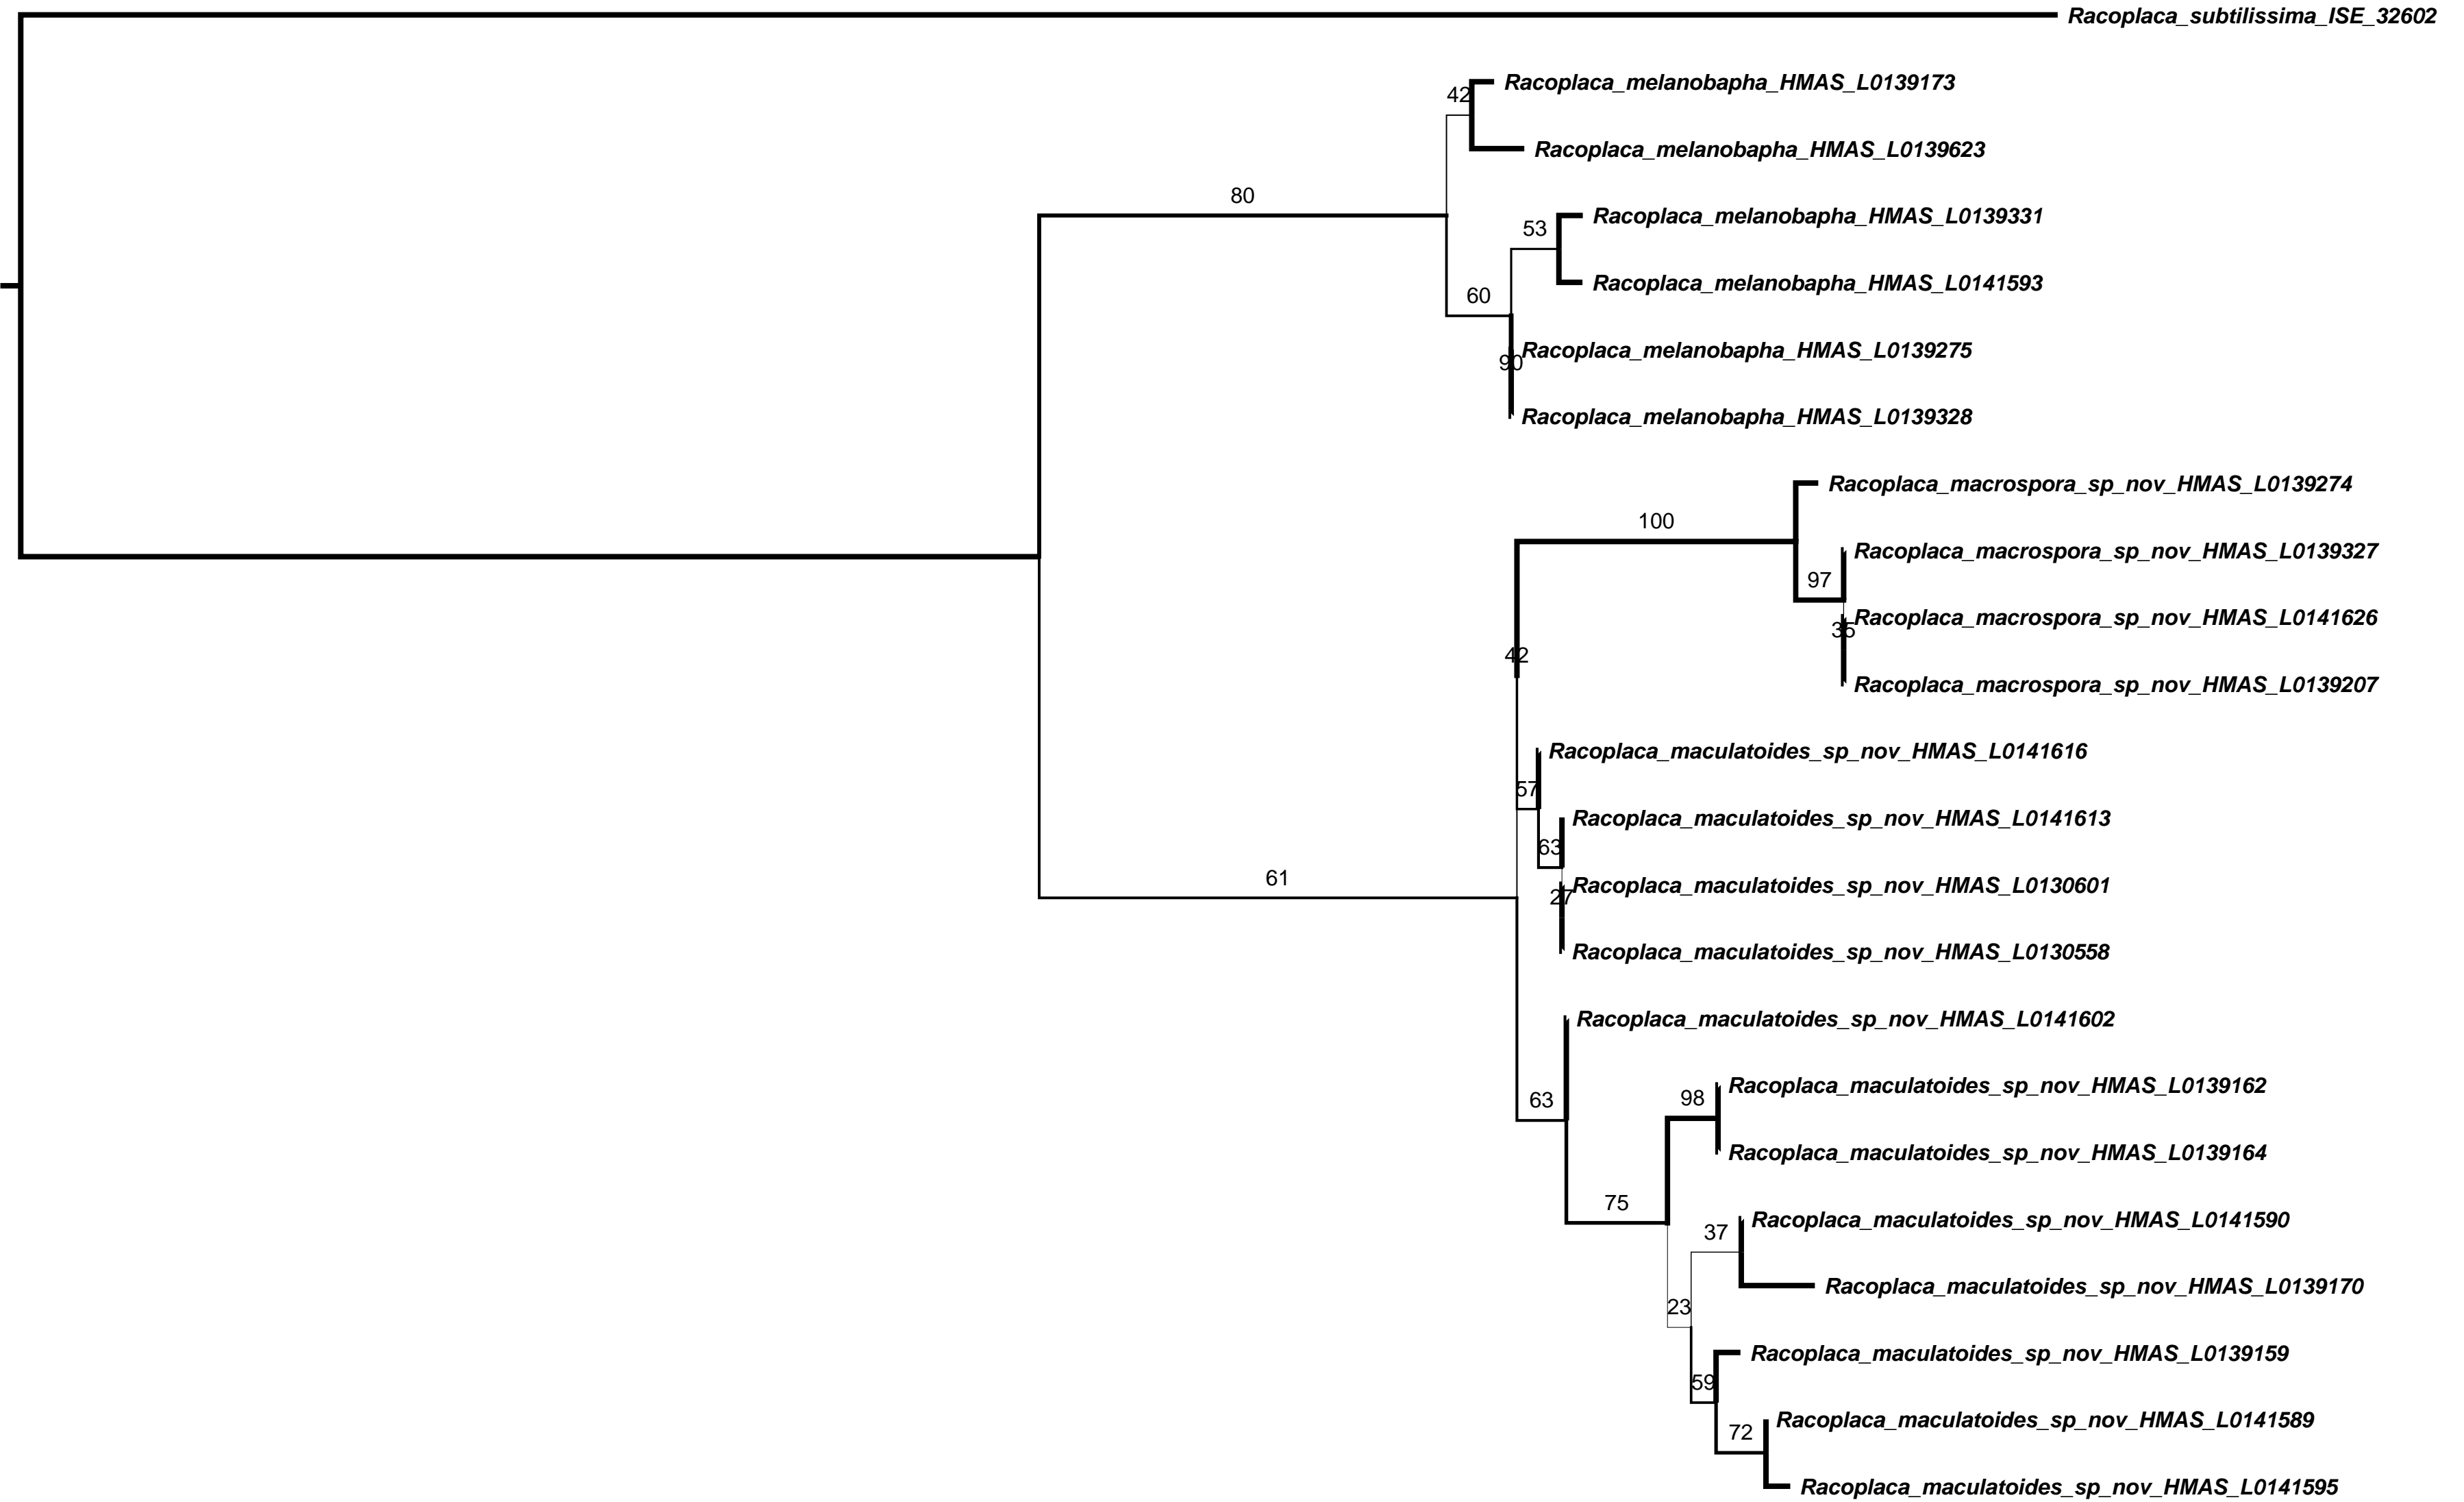

0.03

Supplement: s1 [file s1]
